# Supplementary material for: Naloxone Buyers Club: Overlooked Critical Public Health Infrastructure for Preventing Overdose Deaths
Source: medRxiv preprint, doi:10.1101/2021.11.14.21266221, version 2 (2021-11-16)
Supplement: Contributorship statement [file 266221_file06.docx]

**Contributors**

EJW, MD-S, PJD, AB, TSJ conceptualized the study and developed the questionnaire. EJW and MD-S implemented data collection. ND, MD-S, and MCF conducted data analysis. All authors contributed to writing the manuscript.
