# Supplementary material for: Naloxone Buyers Club: Overlooked Critical Public Health Infrastructure for Preventing Overdose Deaths
Source: bioRxiv or medRxiv preprint supplement (doi:10.1101/2021.11.14.21266221), 2021-11-16
Supplement: Supplementary file [file media-1.pdf]

# The Naloxone Buyers Club

Critical Public Health Infrastructure for Preventing Overdose Deaths

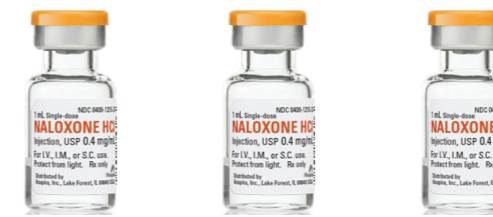

Remedy Alliance // For The People  
Estd. 2012  
RemedyAllianceFTP.org

## Data Sources

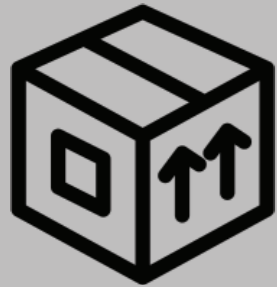

Naloxone Orders  
N=965

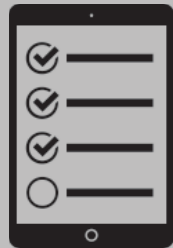

Member Survey  
N=104  
100% response

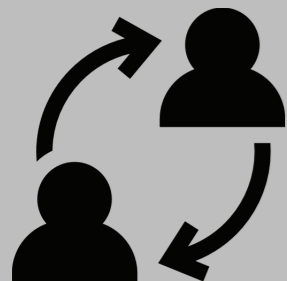

Mutual Aid Requests  
and Offers  
N=86

114 Buyers Club programs  
in 40 states ordered **3.7 million**  
doses of generic injectable  
naloxone.

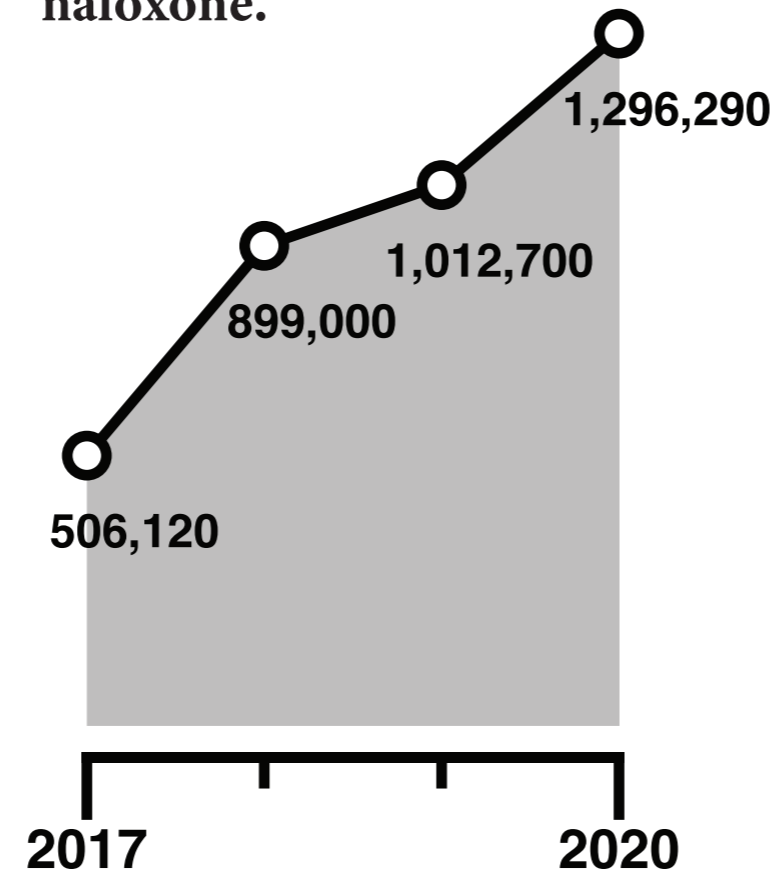

# 52%

of harm reduction  
orgs received NO  
federal funding for  
naloxone and ordered  
1/2 as much as  
programs with federal  
funding

# 80%

of programs shared  
naloxone through  
mutual aid

## Barriers to Access

1) US FDA classification  
of naloxone as  
“prescription-only.”

2) Corporate compliance fears  
of FDA enforcement.

3) Inadequate financial  
investment in programs that  
reach marginalized people.

4) Overemphasis in federal  
policy on retail pharmacy sales  
at the expense of harm  
reduction programs.
